# Supplementary material for: Monolayer Graphene Terahertz Detector Integrated with Artificial Microstructure
Source: MDPI journal article supplement (doi:10.3390/s23063203), 2023-03-17
Supplement: s1 [file s1]

## Supporting information

# Monolayer Graphene Terahertz Detector Integrated with Artificial Microstructure

Mengjie Jiang<sup>1,2</sup>, Kaixuan Zhang<sup>1,2</sup>, Xuyang Lv<sup>1,2</sup>, Lin Wang<sup>2,\*</sup>, Libo Zhang<sup>2,3</sup>, Li Han<sup>2,3</sup>, and Huaizhong Xing<sup>1,\*</sup>

<sup>1</sup> Department of Optoelectronic Science and Engineering, State Key Laboratory for Modification of Chemical Fibers and Polymer Materials, DongHua University, Shanghai 201620, China

<sup>2</sup> State Key Laboratory for Infrared, Physics Shanghai Institute of Technical Physics, Chinese Academy of Sciences, 500 Yu-tian Road, Shanghai 200083, China

<sup>3</sup> College of Physics and Optoelectronic Engineering, Hangzhou Institute for Advanced Study, University of Chinese Academy of Sciences, No. 1, Sub-Lane Xiangshan, Xihu District, Hangzhou 310024, China

\* Correspondence: wanglin@mail.sitp.ac.cn (L.W.); xinghz@dhu.edu.cn (H.X.)

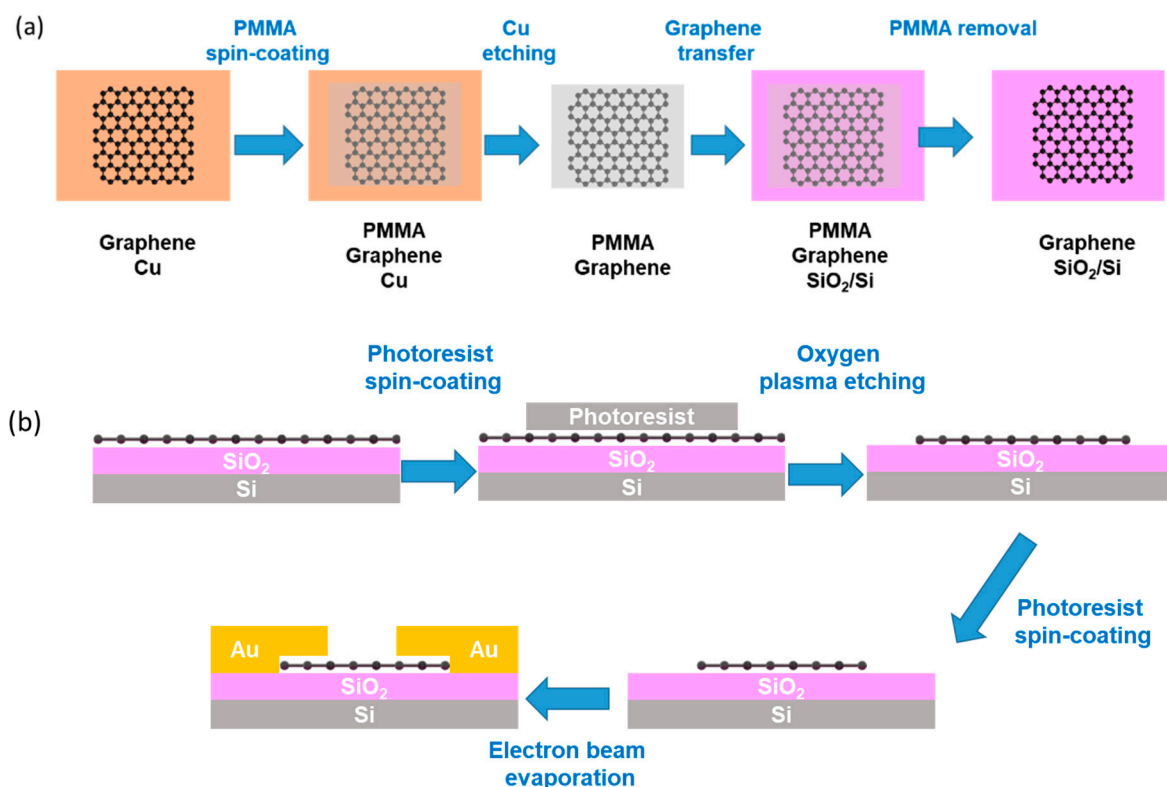

**Figure S1.** (a) Monolayer graphene transfer process (b) Monolayer graphene terahertz detector preparation process.

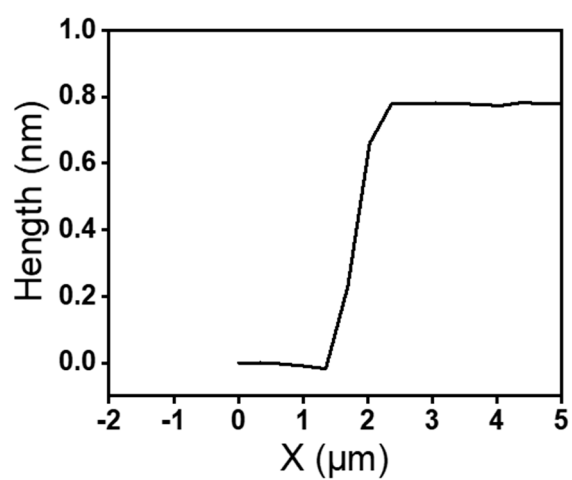

**Figure S2.** Height profile of the monolayer graphene tested by AFM.

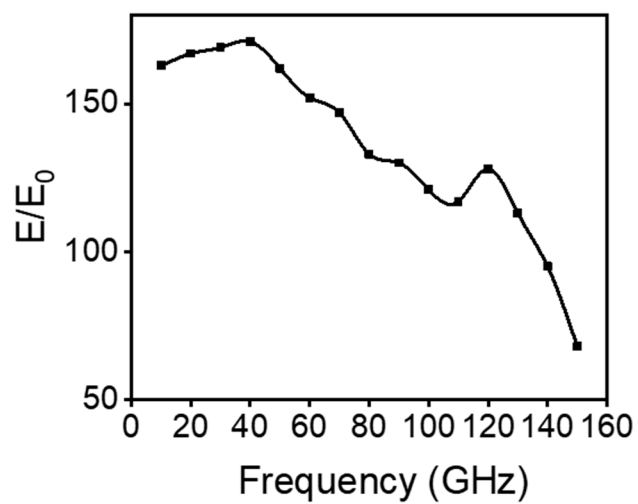

**Figure S3.** The antenna is characterised in the terahertz domain.
